# Supplementary material for: An exopolysaccharide from Lactobacillus pentosus YY-112: structure and effect on the human intestinal microbiota
Source: Royal Society of Chemistry journal article supplement (doi:10.1039/d3fo01739g), 2023-01-01
Supplement: d3fo01739g1.pdf [file d3fo01739g1.pdf]

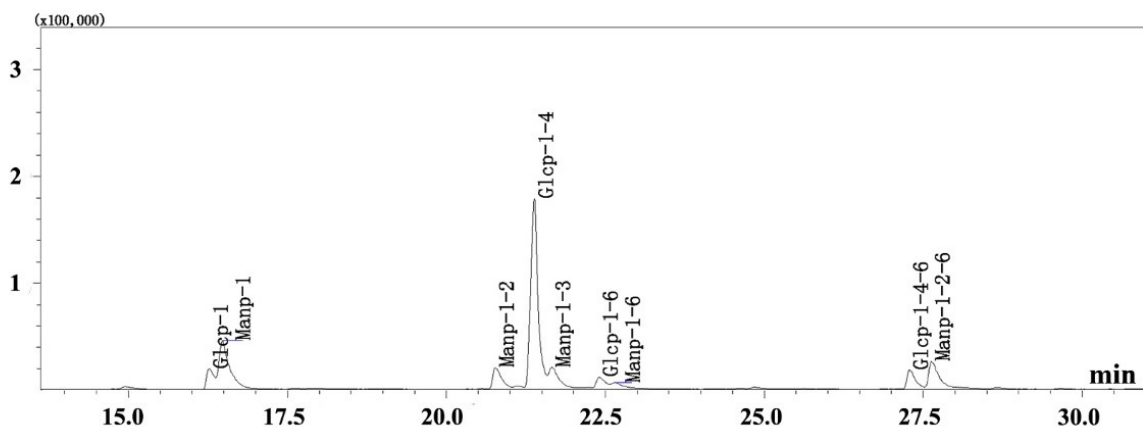

**Figure S1.** Total ion chromatograph (TIC) of partial methylated alditol acetates (PMAA) fragmentation of the derivatives from LPE-2.
